# Supplementary material for: Evolutionary Computation for Modelling Social Traits in Realistic Looking Synthetic Faces
Source: Hindawi journal article supplement (doi:10.1155/2018/9270152), 2018-01-01
Supplement: f1 [file 9270152.f1.pdf]

# Supplementary Materials of “Evolutionary computation for modelling social traits in realistic looking synthetic faces“.

## Scores for each facial trait in CFD and classification of the facial features for each face

| Face   | Facial trait |       |            |            |           |          |          |       |           |            |       |           |             |             |         | Facial feature |     |      |       |     |
|--------|--------------|-------|------------|------------|-----------|----------|----------|-------|-----------|------------|-------|-----------|-------------|-------------|---------|----------------|-----|------|-------|-----|
|        | Afraid       | Angry | Attractive | Baby-faced | Disgusted | Dominant | Feminine | Happy | Masculine | Prototypic | Sad   | Surprised | Threatening | Trustworthy | Unusual | Eyebrow        | Eye | Nose | Mouth | Jaw |
| WM-001 | 2.548        | 2.247 | 2.645      | 3.591      | 2.183     | 1.857    | 2.097    | 1.968 | 3.581     | 3.857      | 3.495 | 1.699     | 1.828       | 3.215       | 2.323   | EB10           | E9  | N12  | M8    | J1  |
| WM-002 | 2.038        | 3.570 | 2.513      | 1.788      | 3.025     | 3.857    | 1.696    | 2.013 | 4.875     | 1.873      | 2.775 | 1.788     | 3.525       | 2.975       | 3.313   | EB3            | E8  | N2   | M1    | J10 |
| WM-003 | 1.988        | 2.446 | 3.683      | 2.880      | 2.181     | 3.360    | 1.916    | 2.542 | 4.892     | 4.191      | 2.675 | 1.892     | 2.566       | 3.578       | 2.639   | EB6            | E16 | N4   | M4    | J5  |
| WM-004 | 1.804        | 1.835 | 4.663      | 2.467      | 1.739     | 3.154    | 1.804    | 2.630 | 4.848     | 4.288      | 2.435 | 1.467     | 1.761       | 3.560       | 1.934   | EB8            | E13 | N2   | M6    | J10 |
| WM-006 | 1.965        | 2.442 | 3.512      | 3.047      | 2.024     | 3.476    | 2.581    | 2.753 | 4.477     | 3.857      | 2.440 | 1.756     | 2.477       | 3.430       | 2.929   | EB6            | E13 | N2   | M6    | J9  |
| WM-009 | 2.120        | 2.783 | 4.076      | 2.912      | 2.380     | 3.346    | 2.033    | 2.261 | 4.728     | 3.488      | 2.391 | 1.856     | 2.457       | 3.511       | 2.231   | EB3            | E11 | N2   | M6    | J11 |
| WM-010 | 2.533        | 3.609 | 2.283      | 2.380      | 2.978     | 2.800    | 1.891    | 1.495 | 3.793     | 3.680      | 3.859 | 1.783     | 3.500       | 2.457       | 2.747   | EB2            | E9  | N4   | M6    | J9  |
| WM-011 | 2.045        | 2.750 | 3.170      | 2.511      | 2.557     | 2.385    | 2.115    | 1.920 | 4.250     | 3.566      | 3.284 | 1.693     | 2.443       | 3.057       | 2.352   | EB5            | E9  | N4   | M6    | J10 |
| WM-012 | 2.483        | 2.843 | 2.841      | 2.500      | 2.404     | 2.481    | 1.674    | 1.921 | 4.551     | 3.957      | 3.157 | 1.787     | 2.506       | 3.360       | 1.886   | EB6            | E16 | N12  | M8    | J8  |
| WM-013 | 2.488        | 2.721 | 2.756      | 2.035      | 2.512     | 2.640    | 1.802    | 2.118 | 4.326     | 3.585      | 3.476 | 1.872     | 2.553       | 3.209       | 1.965   | EB6            | E11 | N9   | M9    | J7  |
| WM-014 | 2.084        | 2.286 | 3.476      | 2.464      | 2.179     | 3.400    | 1.940    | 3.250 | 4.869     | 3.630      | 2.417 | 1.833     | 2.333       | 3.810       | 1.881   | EB8            | E9  | N4   | M5    | J4  |
| WM-015 | 2.128        | 2.628 | 3.512      | 2.977      | 2.198     | 3.043    | 2.314    | 2.174 | 4.302     | 3.943      | 2.588 | 1.882     | 2.384       | 3.314       | 2.395   | EB6            | E14 | N5   | M8    | J10 |
| WM-016 | 2.105        | 3.174 | 3.256      | 1.849      | 2.523     | 4.125    | 1.407    | 2.116 | 5.209     | 4.018      | 2.616 | 1.616     | 3.059       | 3.081       | 1.953   | EB9            | E11 | N8   | M3    | J4  |
| WM-017 | 2.351        | 2.753 | 2.362      | 2.670      | 2.362     | 3.630    | 1.670    | 2.340 | 4.468     | 4.106      | 3.096 | 1.946     | 3.117       | 2.806       | 2.585   | EB9            | E14 | N12  | M6    | J11 |
| WM-018 | 1.890        | 2.444 | 2.700      | 1.780      | 2.143     | 3.519    | 1.560    | 2.396 | 5.033     | 3.407      | 2.589 | 1.700     | 2.703       | 3.389       | 2.618   | EB10           | E4  | N9   | M6    | J11 |
| WM-019 | 2.261        | 3.500 | 2.283      | 2.446      | 2.793     | 3.929    | 1.674    | 1.750 | 4.761     | 2.289      | 2.696 | 1.692     | 3.457       | 2.696       | 2.556   | EB10           | E13 | N12  | M6    | J7  |
| WM-020 | 2.420        | 2.432 | 2.693      | 2.227      | 2.205     | 2.593    | 1.818    | 2.239 | 4.580     | 4.280      | 3.239 | 1.875     | 2.568       | 3.068       | 2.227   | EB9            | E16 | N12  | M9    | J11 |
| WM-021 | 2.176        | 3.200 | 2.659      | 1.671      | 2.329     | 3.958    | 1.424    | 1.976 | 5.294     | 2.220      | 2.536 | 1.988     | 3.259       | 3.000       | 2.405   | EB10           | E15 | N1   | M6    | J3  |
| WM-022 | 1.967        | 3.065 | 2.891      | 2.717      | 2.522     | 3.172    | 1.620    | 2.000 | 4.879     | 1.941      | 2.880 | 1.728     | 3.110       | 3.011       | 2.087   | EB4            | E8  | N8   | M8    | J4  |
| WM-023 | 1.890        | 1.758 | 2.867      | 1.791      | 1.780     | 2.500    | 1.626    | 3.389 | 4.549     | 3.827      | 2.308 | 1.703     | 1.900       | 3.811       | 2.231   | EB5            | E11 | N8   | M9    | J3  |
| WM-024 | 2.427        | 1.939 | 3.646      | 3.610      | 1.901     | 2.280    | 2.220    | 2.890 | 3.951     | 3.269      | 2.585 | 2.183     | 1.817       | 3.780       | 1.914   | EB10           | E13 | N12  | M8    | J11 |
| WM-025 | 2.227        | 1.932 | 2.784      | 3.102      | 1.793     | 1.792    | 2.759    | 2.818 | 3.716     | 4.137      | 2.443 | 1.886     | 1.784       | 3.489       | 2.682   | EB9            | E11 | N8   | M8    | J11 |
| WM-026 | 2.012        | 2.372 | 3.093      | 2.209      | 2.116     | 3.231    | 2.407    | 2.535 | 4.163     | 4.063      | 2.570 | 1.919     | 2.523       | 3.174       | 3.267   | EB2            | E11 | N8   | M4    | J11 |
| WM-028 | 2.525        | 2.563 | 3.200      | 2.550      | 2.538     | 2.636    | 2.200    | 2.638 | 4.263     | 2.022      | 3.075 | 2.388     | 2.413       | 3.550       | 2.900   | EB4            | E15 | N4   | M5    | J7  |
| WM-029 | 1.885        | 1.770 | 4.586      | 2.494      | 1.655     | 2.821    | 1.609    | 2.667 | 5.207     | 3.760      | 2.276 | 1.655     | 1.828       | 3.701       | 2.046   | EB8            | E16 | N12  | M8    | J7  |
| WM-031 | 2.287        | 2.713 | 3.046      | 3.483      | 2.195     | 2.929    | 2.138    | 2.471 | 4.081     | 4.250      | 2.483 | 1.736     | 2.477       | 3.391       | 2.012   | EB2            | E12 | N12  | M8    | J11 |
| WM-032 | 1.816        | 1.851 | 2.644      | 3.253      | 1.884     | 3.120    | 1.885    | 3.686 | 4.517     | 3.933      | 2.058 | 1.954     | 2.186       | 3.563       | 2.733   | EB7            | E13 | N8   | M5    | J7  |
| WM-033 | 1.725        | 1.756 | 3.846      | 2.231      | 1.835     | 2.815    | 1.780    | 2.511 | 4.556     | 4.143      | 2.244 | 1.516     | 1.846       | 3.582       | 1.900   | EB6            | E16 | N5   | M7    | J9  |
| WM-034 | 2.157        | 2.667 | 2.699      | 2.181      | 2.083     | 2.538    | 1.560    | 2.310 | 4.762     | 3.691      | 2.917 | 1.786     | 2.464       | 3.183       | 2.631   | EB7            | E7  | N8   | M4    | J11 |
| WM-035 | 2.593        | 3.835 | 2.165      | 3.033      | 3.429     | 2.963    | 1.725    | 1.901 | 4.484     | 3.357      | 3.088 | 1.923     | 3.396       | 2.758       | 2.527   | EB7            | E13 | N9   | M6    | J8  |
| WM-036 | 2.081        | 2.360 | 2.767      | 2.329      | 2.116     | 2.407    | 2.395    | 1.907 | 3.884     | 2.957      | 3.326 | 1.756     | 2.430       | 2.826       | 3.244   | EB3            | E2  | N5   | M4    | J3  |
| WM-037 | 2.170        | 2.091 | 2.432      | 3.852      | 2.023     | 1.520    | 2.386    | 1.875 | 3.511     | 4.000      | 3.330 | 1.545     | 1.807       | 3.125       | 2.686   | EB5            | E2  | N5   | M7    | J10 |
| WM-038 | 1.933        | 2.862 | 2.618      | 2.079      | 2.281     | 3.286    | 2.124    | 1.843 | 4.466     | 4.250      | 3.000 | 1.494     | 2.787       | 2.966       | 3.125   | EB8            | E14 | N1   | M9    | J7  |
| WM-039 | 2.116        | 2.024 | 2.430      | 3.294      | 1.930     | 1.640    | 2.593    | 1.953 | 3.541     | 4.333      | 3.244 | 1.512     | 1.756       | 3.024       | 3.059   | EB9            | E16 | N5   | M8    | J1  |
| WM-040 | 1.785        | 2.323 | 3.054      | 2.250      | 2.172     | 3.097    | 1.806    | 2.548 | 4.656     | 3.902      | 2.204 | 1.624     | 2.301       | 3.419       | 2.326   | EB7            | E10 | N4   | M1    | J8  |
| WM-041 | 2.190        | 2.800 | 2.141      | 3.141      | 2.624     | 2.560    | 1.729    | 1.750 | 4.141     | 2.089      | 2.612 | 1.718     | 2.635       | 2.976       | 2.412   | EB10           | E13 | N8   | M7    | J6  |
| WM-200 | 2.115        | 2.077 | 3.269      | 3.520      | 1.846     | 2.038    | 1.731    | 2.308 | 3.846     | 4.434      | 3.192 | 1.808     | 1.769       | 3.654       | 1.920   | EB5            | E16 | N7   | M7    | J7  |
| WM-201 | 1.727        | 2.000 | 1.727      | 2.783      | 1.913     | 2.739    | 1.364    | 2.636 | 4.636     | 4.020      | 2.435 | 1.739     | 1.739       | 3.130       | 2.261   | EB10           | E1  | N10  | M2    | J2  |
| WM-202 | 1.769        | 1.560 | 2.654      | 3.192      | 1.269     | 2.038    | 1.680    | 2.269 | 4.346     | 3.163      | 1.769 | 1.423     | 1.654       | 3.769       | 2.000   | EB10           | E11 | N9   | M6    | J6  |
| WM-203 | 1.417        | 2.333 | 3.500      | 2.348      | 1.917     | 3.250    | 1.333    | 2.125 | 4.870     | 4.390      | 2.375 | 1.417     | 2.500       | 3.542       | 1.542   | EB7            | E10 | N9   | M6    | J5  |
| WM-204 | 1.433        | 1.933 | 3.200      | 1.900      | 1.586     | 3.500    | 1.483    | 2.100 | 5.367     | 4.438      | 1.690 | 1.267     | 2.467       | 3.267       | 1.700   | EB8            | E12 | N9   | M5    | J3  |
| WM-205 | 1.840        | 3.042 | 3.800      | 2.320      | 2.200     | 3.520    | 1.542    | 1.600 | 5.000     | 4.429      | 1.960 | 1.440     | 2.600       | 3.040       | 1.920   | EB10           | E7  | N10  | M8    | J5  |
| WM-206 | 1.903        | 1.871 | 1.806      | 3.387      | 2.000     | 2.097    | 2.258    | 2.677 | 2.935     | 3.839      | 2.032 | 1.774     | 2.000       | 3.258       | 3.710   | EB9            | E14 | N10  | M6    | J9  |
| WM-207 | 1.478        | 1.625 | 4.125      | 1.958      | 1.435     | 3.625    | 1.333    | 3.087 | 5.208     | 2.520      | 1.458 | 1.417     | 2.000       | 3.333       | 2.458   | EB10           | E11 | N9   | M5    | J4  |
| WM-208 | 1.929        | 1.679 | 2.655      | 3.724      | 1.828     | 2.179    | 2.034    | 3.241 | 3.310     | 3.732      | 2.000 | 1.966     | 1.655       | 3.586       | 1.655   | EB7            | E14 | N10  | M5    | J2  |

|        |       |       |       |       |       |       |       |       |       |       |       |       |       |       |       |      |     |     |    |     |
|--------|-------|-------|-------|-------|-------|-------|-------|-------|-------|-------|-------|-------|-------|-------|-------|------|-----|-----|----|-----|
| WM-209 | 2.222 | 1.571 | 3.536 | 3.607 | 1.821 | 1.821 | 2.143 | 2.357 | 3.607 | 3.980 | 2.269 | 1.893 | 1.821 | 3.536 | 1.714 | EB9  | E3  | N7  | M7 | J7  |
| WM-210 | 2.214 | 2.407 | 2.964 | 3.179 | 1.821 | 2.000 | 1.679 | 2.036 | 3.481 | 3.824 | 2.786 | 1.750 | 1.714 | 3.321 | 2.071 | EB8  | E13 | N10 | M8 | J8  |
| WM-211 | 1.786 | 1.536 | 3.464 | 2.069 | 1.464 | 2.690 | 1.759 | 1.966 | 4.607 | 3.808 | 1.621 | 1.586 | 1.897 | 3.172 | 3.345 | EB5  | E16 | N10 | M7 | J9  |
| WM-212 | 1.963 | 3.333 | 3.704 | 2.296 | 2.885 | 4.111 | 1.815 | 1.926 | 4.963 | 3.957 | 2.444 | 1.577 | 3.333 | 3.481 | 2.519 | EB7  | E1  | N8  | M9 | J9  |
| WM-213 | 1.760 | 1.960 | 3.708 | 3.000 | 1.560 | 3.000 | 1.920 | 3.826 | 4.160 | 4.127 | 1.840 | 1.680 | 1.960 | 3.560 | 2.320 | EB5  | E11 | N8  | M7 | J10 |
| WM-214 | 1.800 | 1.680 | 3.120 | 3.600 | 1.720 | 2.480 | 2.250 | 3.400 | 3.667 | 4.132 | 1.880 | 2.040 | 1.680 | 3.720 | 2.240 | EB6  | E16 | N12 | M8 | J11 |
| WM-215 | 1.964 | 2.071 | 1.893 | 3.000 | 2.071 | 2.071 | 1.786 | 1.815 | 4.185 | 3.432 | 3.857 | 1.929 | 2.000 | 3.107 | 2.429 | EB10 | E15 | N9  | M8 | J4  |
| WM-216 | 2.654 | 2.115 | 2.654 | 2.962 | 2.308 | 2.077 | 2.000 | 1.615 | 3.615 | 3.841 | 3.000 | 2.038 | 2.077 | 3.192 | 2.192 | EB8  | E9  | N10 | M4 | J10 |
| WM-217 | 2.500 | 3.462 | 3.077 | 4.231 | 2.269 | 2.808 | 2.769 | 1.846 | 3.462 | 2.813 | 2.538 | 2.154 | 2.846 | 3.115 | 2.962 | EB10 | E16 | N10 | M8 | J8  |
| WM-218 | 1.536 | 2.071 | 2.857 | 1.857 | 1.571 | 2.500 | 1.357 | 1.889 | 4.393 | 2.596 | 2.071 | 1.464 | 1.778 | 3.107 | 1.893 | EB3  | E8  | N9  | M9 | J1  |
| WM-219 | 1.708 | 2.000 | 2.958 | 2.348 | 1.458 | 2.833 | 1.792 | 1.750 | 4.583 | 4.096 | 3.167 | 1.708 | 1.750 | 3.250 | 1.625 | EB10 | E12 | N7  | M9 | J8  |
| WM-220 | 1.926 | 3.741 | 2.519 | 1.852 | 2.444 | 4.615 | 1.407 | 2.308 | 5.074 | 3.792 | 2.000 | 1.852 | 4.385 | 2.481 | 3.407 | EB7  | E7  | N10 | M8 | J8  |
| WM-221 | 1.593 | 3.148 | 3.154 | 1.704 | 2.296 | 4.259 | 1.370 | 1.889 | 4.926 | 4.390 | 2.538 | 1.519 | 2.519 | 3.556 | 1.926 | EB7  | E10 | N10 | M9 | J8  |
| WM-222 | 3.000 | 2.750 | 2.345 | 2.207 | 2.517 | 2.571 | 2.138 | 1.655 | 4.071 | 3.455 | 2.793 | 2.000 | 2.586 | 2.759 | 2.724 | EB10 | E12 | N7  | M2 | J8  |
| WM-223 | 1.583 | 2.880 | 3.080 | 1.120 | 2.120 | 4.360 | 1.000 | 1.960 | 5.480 | 3.170 | 2.542 | 1.360 | 3.083 | 3.000 | 2.040 | EB8  | E15 | N3  | M5 | J5  |
| WM-224 | 2.222 | 3.143 | 2.464 | 1.786 | 2.179 | 4.179 | 1.893 | 1.571 | 4.750 | 4.107 | 2.143 | 1.536 | 3.643 | 2.821 | 4.286 | EB9  | E14 | N7  | M8 | J8  |
| WM-225 | 1.500 | 1.926 | 3.036 | 1.893 | 1.407 | 3.107 | 1.357 | 2.679 | 4.607 | 4.385 | 1.857 | 1.393 | 2.000 | 3.704 | 2.036 | EB8  | E16 | N10 | M8 | J9  |
| WM-227 | 1.773 | 2.545 | 2.435 | 2.000 | 1.955 | 3.609 | 1.739 | 1.826 | 4.739 | 1.811 | 2.522 | 1.609 | 2.348 | 3.087 | 1.913 | EB2  | E6  | N7  | M9 | J7  |
| WM-228 | 1.769 | 2.556 | 1.889 | 2.346 | 2.259 | 3.148 | 1.815 | 2.115 | 4.423 | 1.636 | 2.519 | 1.630 | 2.577 | 3.000 | 3.593 | EB10 | E8  | N1  | M6 | J2  |
| WM-229 | 1.792 | 2.696 | 2.792 | 2.083 | 1.875 | 2.625 | 1.250 | 1.913 | 4.125 | 4.000 | 2.167 | 1.417 | 2.292 | 2.958 | 1.875 | EB10 | E12 | N7  | M7 | J3  |
| WM-230 | 1.815 | 1.786 | 3.143 | 3.964 | 2.000 | 2.679 | 1.852 | 3.214 | 3.821 | 4.273 | 1.929 | 1.500 | 2.036 | 3.393 | 2.036 | EB5  | E9  | N7  | M9 | J6  |
| WM-231 | 2.000 | 2.172 | 3.643 | 4.069 | 1.655 | 2.607 | 1.862 | 2.310 | 4.241 | 2.235 | 2.586 | 1.483 | 2.138 | 3.276 | 1.897 | EB3  | E6  | N6  | M7 | J6  |
| WM-232 | 2.667 | 3.538 | 2.593 | 2.704 | 2.926 | 2.593 | 1.741 | 1.889 | 4.370 | 3.625 | 3.407 | 1.852 | 3.037 | 2.778 | 2.704 | EB10 | E12 | N6  | M7 | J11 |
| WM-233 | 2.208 | 2.391 | 2.125 | 2.000 | 2.375 | 3.333 | 1.833 | 2.375 | 4.542 | 1.571 | 2.292 | 1.917 | 2.500 | 3.000 | 2.917 | EB4  | E15 | N11 | M7 | J10 |
| WM-234 | 1.862 | 2.862 | 2.552 | 2.724 | 2.000 | 3.107 | 1.586 | 2.138 | 4.517 | 4.260 | 2.172 | 1.310 | 2.517 | 2.862 | 1.897 | EB4  | E5  | N11 | M2 | J2  |
| WM-235 | 1.429 | 3.000 | 3.357 | 2.464 | 2.037 | 3.074 | 1.571 | 1.679 | 4.321 | 4.250 | 2.074 | 1.357 | 3.000 | 2.571 | 1.679 | EB1  | E5  | N6  | M7 | J9  |
| WM-236 | 1.692 | 1.500 | 2.038 | 3.808 | 1.308 | 1.560 | 2.769 | 1.923 | 2.840 | 3.170 | 2.923 | 1.231 | 1.538 | 3.000 | 2.769 | EB2  | E4  | N6  | M4 | J10 |
| WM-237 | 1.966 | 2.552 | 2.517 | 2.069 | 2.172 | 2.724 | 1.679 | 1.793 | 4.286 | 3.792 | 2.552 | 1.643 | 2.414 | 3.000 | 2.414 | EB3  | E6  | N5  | M8 | J8  |
| WM-238 | 1.667 | 2.364 | 3.273 | 2.182 | 2.136 | 3.318 | 1.500 | 2.409 | 4.591 | 3.712 | 1.773 | 1.429 | 2.909 | 3.000 | 2.136 | EB4  | E7  | N11 | M7 | J11 |
| WM-239 | 2.321 | 2.000 | 2.964 | 4.286 | 2.214 | 2.179 | 2.071 | 2.321 | 3.786 | 3.778 | 2.393 | 1.893 | 2.107 | 3.286 | 1.964 | EB4  | E9  | N6  | M4 | J7  |
| WM-240 | 3.385 | 2.200 | 3.346 | 2.192 | 2.038 | 2.731 | 1.920 | 1.760 | 4.500 | 3.489 | 4.154 | 1.731 | 2.231 | 3.500 | 2.654 | EB8  | E7  | N6  | M7 | J10 |
| WM-241 | 2.000 | 3.462 | 3.000 | 1.889 | 2.037 | 4.037 | 2.000 | 2.259 | 4.704 | 4.043 | 2.259 | 1.577 | 3.000 | 3.111 | 2.926 | EB7  | E10 | N11 | M8 | J9  |
| WM-242 | 1.759 | 2.571 | 4.034 | 2.310 | 2.724 | 2.828 | 1.759 | 1.724 | 4.214 | 3.255 | 2.241 | 1.345 | 2.143 | 3.138 | 2.310 | EB1  | E16 | N6  | M7 | J5  |
| WM-243 | 1.880 | 3.200 | 3.160 | 1.840 | 2.375 | 3.880 | 1.760 | 1.760 | 4.652 | 2.410 | 2.200 | 1.600 | 3.560 | 2.560 | 3.360 | EB7  | E15 | N3  | M9 | J11 |
| WM-244 | 1.538 | 2.037 | 3.037 | 1.852 | 1.680 | 3.481 | 1.692 | 2.815 | 5.111 | 3.386 | 1.778 | 1.778 | 2.370 | 2.889 | 2.370 | EB4  | E5  | N3  | M3 | J6  |
| WM-245 | 2.586 | 2.931 | 3.357 | 2.143 | 2.714 | 2.862 | 1.345 | 1.448 | 4.621 | 3.956 | 3.414 | 1.379 | 2.759 | 2.828 | 1.931 | EB8  | E15 | N11 | M9 | J9  |
| WM-247 | 2.040 | 2.269 | 2.720 | 2.462 | 2.038 | 2.615 | 1.769 | 2.577 | 3.923 | 2.765 | 2.458 | 1.769 | 2.077 | 3.231 | 2.154 | EB4  | E15 | N6  | M9 | J9  |
| WM-248 | 2.000 | 2.000 | 2.846 | 1.731 | 2.000 | 2.962 | 1.360 | 2.308 | 4.462 | 4.040 | 2.500 | 1.923 | 2.385 | 3.231 | 2.038 | EB5  | E5  | N7  | M2 | J10 |
| WM-249 | 2.481 | 3.037 | 2.407 | 1.556 | 2.407 | 3.333 | 1.222 | 1.333 | 4.148 | 4.100 | 3.222 | 1.538 | 3.407 | 2.308 | 2.889 | EB6  | E15 | N9  | M9 | J6  |
| WM-250 | 2.167 | 1.880 | 4.120 | 3.720 | 2.040 | 3.640 | 1.560 | 1.875 | 4.680 | 1.250 | 2.680 | 1.640 | 2.000 | 3.360 | 2.240 | EB10 | E3  | N6  | M7 | J9  |
| WM-251 | 2.040 | 2.080 | 2.600 | 2.080 | 1.960 | 2.560 | 1.680 | 3.200 | 4.320 | 4.038 | 2.480 | 1.792 | 1.920 | 3.400 | 2.480 | EB10 | E15 | N11 | M4 | J3  |
| WM-252 | 1.778 | 2.296 | 3.111 | 2.000 | 2.074 | 3.037 | 1.370 | 2.704 | 5.148 | 2.222 | 1.889 | 1.741 | 1.963 | 3.889 | 2.222 | EB4  | E15 | N3  | M5 | J5  |
| WM-253 | 1.538 | 1.692 | 3.500 | 3.077 | 1.769 | 2.760 | 1.760 | 3.269 | 3.846 | 2.049 | 1.731 | 1.654 | 2.000 | 3.154 | 2.346 | EB3  | E9  | N11 | M3 | J3  |
| WM-254 | 1.308 | 2.077 | 3.154 | 2.077 | 1.615 | 3.231 | 1.231 | 2.538 | 4.808 | 4.149 | 1.269 | 1.154 | 2.000 | 3.231 | 1.308 | EB10 | E16 | N12 | M9 | J4  |
| WM-255 | 1.444 | 2.250 | 2.259 | 1.571 | 1.821 | 3.214 | 1.643 | 2.571 | 4.714 | 1.769 | 2.143 | 1.393 | 2.750 | 2.893 | 3.000 | EB10 | E15 | N11 | M9 | J9  |
| WM-256 | 1.769 | 2.385 | 2.269 | 2.615 | 1.962 | 3.231 | 1.640 | 2.346 | 4.385 | 2.214 | 1.960 | 1.923 | 2.385 | 3.000 | 1.769 | EB10 | E11 | N12 | M6 | J6  |
| WM-257 | 1.926 | 1.333 | 3.741 | 2.280 | 1.185 | 2.185 | 1.815 | 2.519 | 4.346 | 3.082 | 2.519 | 1.741 | 1.556 | 3.923 | 2.667 | EB5  | E12 | N12 | M3 | J10 |
| WM-258 | 1.222 | 1.630 | 2.148 | 1.778 | 1.852 | 3.231 | 1.148 | 3.074 | 4.667 | 4.244 | 1.593 | 1.519 | 2.000 | 3.333 | 2.185 | EB6  | E16 | N11 | M8 | J9  |
